# Supplementary material for: Ratiometric fluorescence probe of Cu2+ and biothiols by using carbon dots and copper nanoclusters
Source: Royal Society of Chemistry journal article supplement (doi:10.1039/d1ra05854a), 2021-01-01
Supplement: d1ra05854a1.pdf [file d1ra05854a1.pdf]

## Supplementary Material

### **Ratiometric fluorescence probe of Cu<sup>2+</sup> and biothiols by using carbon dots and copper nanoclusters**

Ning Zhao<sup>a</sup>, Jianqiang Song<sup>a</sup>, Zheng Huang<sup>a</sup>, Xiuying Yang<sup>b</sup>, Yousheng Wang<sup>b</sup>,  
Longshan Zhao<sup>a\*</sup>

<sup>a</sup> *School of Pharmacy, Shenyang Pharmaceutical University, 103 Wenhua Road Shenhe District, Shenyang, Liaoning, 110016, P. R. China*

<sup>b</sup> *Hainan Vocational University of Science and Technology Key Laboratory of Medicinal and Edible Plants Resources of Hainan Province, Haikou, Hainan 571126*

\*Correspondence: Associate Professor Longshan Zhao, School of Pharmacy, Shenyang Pharmaceutical University, 103 Wenhua Road Shenhe District, 110016, Shenyang, Liaoning Province, P. R. China.

E-mail: [longshanzhao@163.com](mailto:longshanzhao@163.com).

Tel. /Fax: 86-24 4352 0571

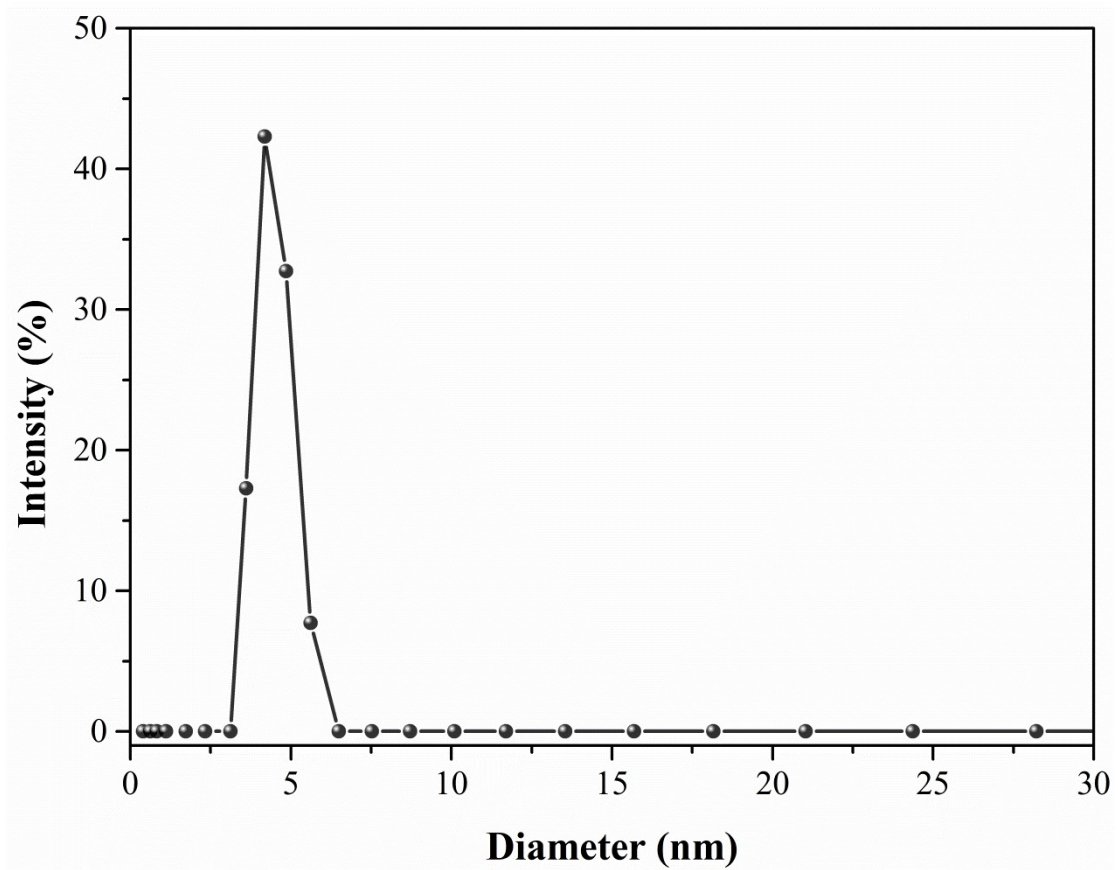

**Fig. S1.** Hydrodynamic size distribution of y-CDs in water.

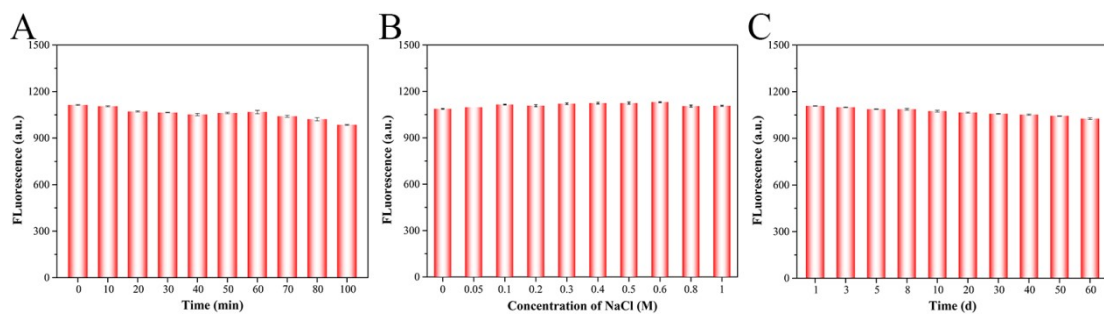

**Fig. S2.** The effects of (A) radiation time, (B) NaCl concentration and (C) storage time on the fluorescence intensity of  $\gamma$ -CDs.  $\lambda_{\text{ex}} = 420 \text{ nm}$ ,  $\lambda_{\text{em}} = 567 \text{ nm}$ .

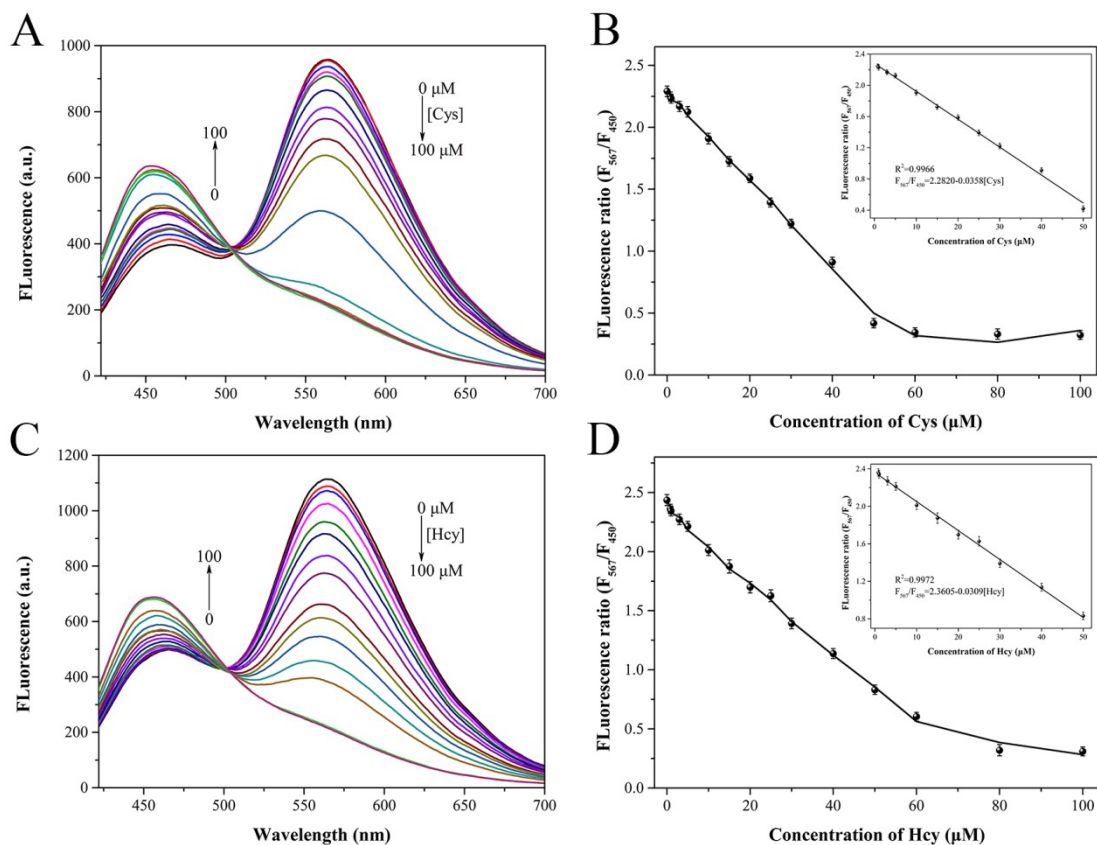

**Fig. S3.** Fluorescence emission spectra of ratiometric fluorescence probe in the presence of different concentrations of (A) Cys and (C) Hcy (0 - 100  $\mu\text{M}$ ). The curves of fluorescence intensity ratio of  $F_{567}/F_{450}$  with various concentrations of (B) Cys and (D) Hcy. Insets: linear relationships of  $F_{567}/F_{450}$  versus the concentrations of Cys and Hcy from 0.8 to 50  $\mu\text{M}$ .

**Table S1.** Comparison of this method for the detection of Cu<sup>2+</sup> with those reported ratiometric fluorescence methods.

| Probes               | Linear range ( $\mu\text{M}$ ) | LOD ( $\mu\text{M}$ ) | Reference |
|----------------------|--------------------------------|-----------------------|-----------|
| BODIPY derivative    | 0.4-2.2/2.4-6.5                | 0.08                  | 1         |
| Rhodamine/cyanine    | 0-20                           | 1.019                 | 2         |
| Near-infrared BODIPY | 0-24                           | 1.02                  | 3         |
| CDs/ CdSe/ZnS QDs    | 4-40                           | 2.74                  | 4         |
| AuNCs/N-CDs          | 10-150                         | 3.5                   | 5         |
| y-CDs/CuNCs          | 0.5-100                        | 0.21                  | This work |

**Table S2.** Comparison of this method for the detection of biothiols with those reported ratiometric fluorescence methods.

| Probes                                                  | GSH               |                   | Cys               |                   | Hcy               |                   | Reference |
|---------------------------------------------------------|-------------------|-------------------|-------------------|-------------------|-------------------|-------------------|-----------|
|                                                         | Linear range      | LOD               | Linear range      | LOD               | Linear range      | LOD               |           |
|                                                         | ( $\mu\text{M}$ ) |           |
| BODIPY/rhodamine                                        | 10-100            | 0.26              | Not given         |                   | Not given         |                   | 6         |
| AgNCs/Au <sup>3+</sup> -g-C <sub>3</sub> N <sub>4</sub> | 5-100             | 0.8               | Not given         |                   | Not given         |                   | 7         |
| Azamonardine/MPA-CdTe QDs                               | Not given         |                   | 2-12              | 0.6               | Not given         |                   | 8         |
| TAT peptide                                             | 0-12              | 5.15              | 0-12              | 0.865             | 0-12              | 6.51              | 9         |
| L-Cys-BODIPY/M-MoS <sub>2</sub> QDs                     | 1000-10000        | 300               | 1-10              | 0.3               | 1-10              | 0.3               | 10        |
| Cu <sup>2+</sup> -( $\gamma$ -CDs)/CuNCs                | 0.8-50            | 0.33              | 0.8-50            | 0.39              | 0.8-50            | 0.46              | This work |

## References

- 1 T. T. Shu, Z. H. Yang, Z. T. Cen, X. K. Deng, Y. Deng, C. Z. Dong and Y. H. Yu, *Anal. Methods*, 2018, **10**, 5755–5762.
- 2 S. Li, D. Zhang, X. Xie, S. Ma, Y. Liu, Z. Xu, Y. Gao and Y. Ye, *Sens. Actuators B Chem.*, 2016, **224**, 661–667.
- 3 Y. Huang, C. F. Li, W. J. Shi, H. Y. Tan, Z. Z. He, L. Zheng, F. Liu and J. W. Yan, *Talanta*, 2019, **198**, 390–397.
- 4 S. Zhu, F. Zhao, M. Deng, T. Zhang and C. Lü, *Dyes Pigm.*, 2019, **168**, 369–380.
- 5 Y. Z. Yang, N. Xiao, Y. Y. Cen, J. R. Chen, S. G. Liu, Y. Shi, Y. Z. Fan, N. B. Li and H. Q. Luo, *Spectrochim Acta A Mol Biomol Spectrosc*, 2019, **223**, 117300.
- 6 L. Wang, J. Wang, S. Xia, X. Wang, Y. Yu, H. Zhou and H. Liu, *Talanta*. 2020, **219**, 121296.
- 7 J. Zhou, Y. Xiao, X. Zhang and S. Wang, *Talanta*. 2018, **188**, 623–629.
- 8 H. Zhang, Y. Xiao, X. Zhang and S. Wang, *Analyst*, 2019, **144**, 4520–4525.
- 9 P. Su, Z. Zhu, Y. Tian, L. Liang, W. Wu, J. Cao, B. Cheng, W. Liu and Y. Tang, *Talanta*, 2020, **218**, 121127.
- 10 A. S. Krishna Kumar, W. B. Tseng, M. J. Wu, Y. Y. Huang and W. L. Tseng, *Anal. Chim. Acta*, 2020, **1113**, 43–51.
